# Supplementary material for: TRPM7 promotes the epithelial–mesenchymal transition in ovarian cancer through the calcium-related PI3K / AKT oncogenic signaling
Source: PubMed Central journal article supplement (PMC6396458; doi:10.1186/s13046-019-1061-y), 2019-02-28

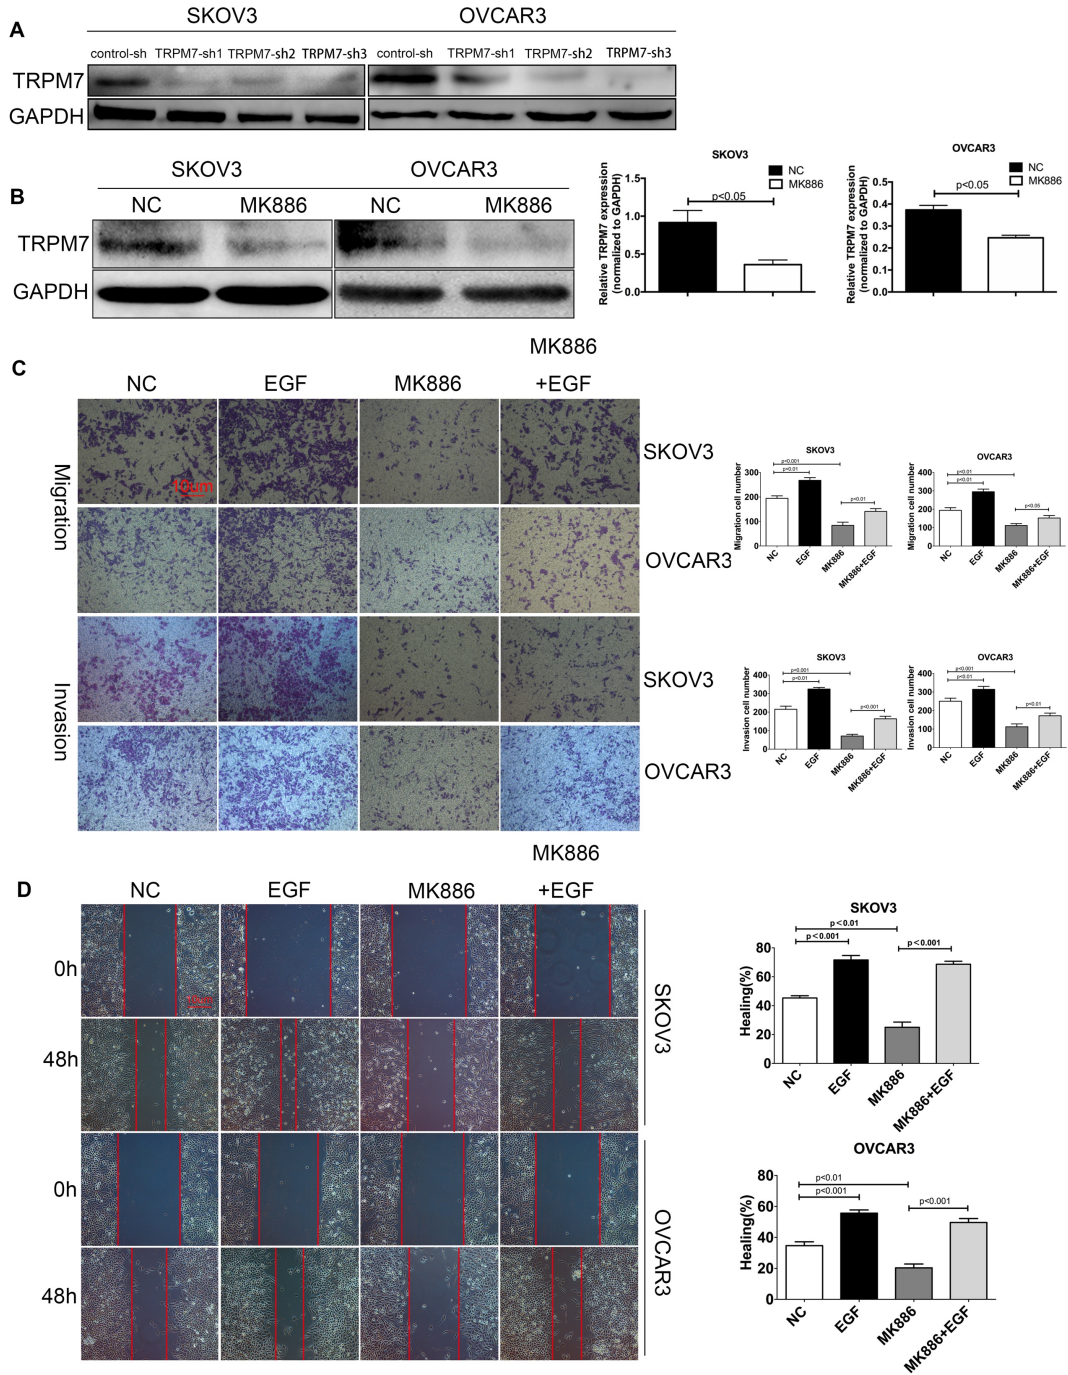

Supplement: 13046_2019_1061_MOESM2_ESM.pdf [file 13046_2019_1061_MOESM2_ESM.pdf]
